# Supplementary material
Source: PubMed Central journal article supplement (PMC4715746)
Supplement: NIHMS715312-supplement-01.pdf [file NIHMS715312-supplement-01.pdf]

| Autoantigen           | Vendor                  | Catalog #   | Notes                                                                                                           |
|-----------------------|-------------------------|-------------|-----------------------------------------------------------------------------------------------------------------|
| Actin                 | Sigma                   | A2522       | From rabbit muscle                                                                                              |
| alpha actinin         | Sigma                   | A9776       | Chicken gizzard                                                                                                 |
| BPI                   | The Binding Site/Arotec | ATB01-02    | Bactericidal/permeability increasing protein, from human neutrophils                                            |
| C1q                   | Biodesign               | A90150H     | Human serum                                                                                                     |
| CENPA                 | Diarect                 | 16901       | Recombinant human                                                                                               |
| CENP B                | Diarect                 | 12501       | Recombinant human                                                                                               |
| dsDNA (plasmid)       | Diarect                 | 12301       | Double-stranded DNA 3.4 kb plasmid, from E. coli                                                                |
| dsDNA (salmon)        | Sigma                   | D1626       | Double-stranded DNA, from salmon                                                                                |
| GBM-dissoc            | Diarect                 | 16801       | Glomerular basement membrane, dissociated, human alpha-3 chain of collagen IV, recombinant human                |
| ssDNA                 | Sigma                   | D7656       | Single-stranded DNA (587-831 nt), from salmon                                                                   |
| GBM-undissoc          | Diarect                 | 15901       | Glomerular basement membrane, undissociated, human alpha-3 chain of collagen IV, recombinant human              |
| Grp78                 | Assay Designs/Stressgen | SPP-765F    | Immunoglobulin heavy chain binding protein (BiP), recombinant hamster                                           |
| HIS 1000 (whole hist) | Immunovision            | His-1000    | Whole histones, from chicken red blood cells                                                                    |
| HIS 1001              | Immunovision            | His-1001    | Histone H1, from bovine tissue                                                                                  |
| HIS 1002              | Immunovision            | His-1002    | Histone H1, from bovine thymus                                                                                  |
| HIS 1003              | Immunovision            | His-1003    | Histone H2b, from bovine tissue                                                                                 |
| HIS 1004              | Immunovision            | His-1004    | Histone H3 and H4, from bovine tissue                                                                           |
| Hsp60                 | Assay Designs/Stressgen | NSP-540     | Heat shock protein 60kDa, recombinant human                                                                     |
| Hsp25                 | Assay Designs/Stressgen | NSP-510F    | Heat shock protein 25kDa, recombinant murine                                                                    |
| IF                    | Diarect                 | 16701       | Intrinsic factor, recombinant human                                                                             |
| Jo-1                  | Diarect                 | 12900       | Histidyl-tRNA synthetase, recombinant human                                                                     |
| Ku                    | Diarect                 | 17300       | p70/p80, recombinant human                                                                                      |
| La/SS-B               | Diarect                 | 12800       | Recombinant human                                                                                               |
| LC1                   | Diarect                 | 13700       | Formiminotransferase Cyclodeaminase (liver cytosol type 1 antigen), recombinant human                           |
| mda ldl               | Academy Bio-medical C   | 20P-MD-L110 | Malondialdehyde modified human low density lipoprotein                                                          |
| HDL                   | Academy Bio-medical     | 80P-HD101   |                                                                                                                 |
| Mi-2                  | Diarect                 | 18100       | Mi-2protein, recombinant human                                                                                  |
| MPO -BD               | Biodesign               | A3C181H     | Human neutrophils                                                                                               |
| PCNA                  | Diarect                 | 15400       | Proliferating cell nuclear antigen, recombinant human                                                           |
| PDH                   | Sigma                   | P7032       | Pyruvate dehydrogenase, from porcine heart                                                                      |
| PL-12                 | Diarect                 | 15701       | Alanyl-tRNA synthetase, recombinant human                                                                       |
| PL-7                  | Diarect                 | 15601       | Threonyl-tRNA synthetase, recombinant human                                                                     |
| PR3                   | ImmunoVision            | PR3-3000    | Proteinase 3 antigen (cANCA antigen), from human promyelocytic cell line                                        |
| ribo p                | Diarect                 | 14101       | Ribosomal Phosphoprotein P0, recombinant human                                                                  |
| Ro/SS-A 52 kDa        | Diarect                 | 12701       | Ro-52 ribonucleoprotein, recombinant human                                                                      |
| Ro/SS-A 60 kDa        | Diarect                 | 17401       | Ro-60 ribonucleoprotein, recombinant human                                                                      |
| bRo/SS-A 60kDa        | Diarect                 | 15501       | Ro-60 Ribonucleoprotein, from calf thymus                                                                       |
| Scl-70 (full)         | Diarect                 | 12401       | DNA topoisomerase I full-length 100kDa form, recombinant human                                                  |
| Scl-70 (trunc)        | Diarect                 | 14501       | DNA topoisomerase I truncated 70kDa processed antigenic form, recombinant human                                 |
| SMA 3000 (Smith)      | ImmunoVision            | SMA-3000    | Smith antigen (small nuclear ribonucleoproteins B, B', D), from bovine spleen or thymus                         |
| SRC 3000 (Sm/RRP)     | ImmunoVision            | SRC-3000    | Small nuclear ribonucleoprotein complex (A, B, B', C, D, E/F, G), from calf spleen, thymus and/or rabbit thymus |
| SRP54                 | SurModics               | A18401      | Signal recognition particle 54, recombinant human                                                               |
| TG                    | Diarect                 | 12201       | Thyroglobulin, from human thyroid glands                                                                        |
| TPO                   | Diarect                 | 12101       | Thyroperoxidase, recombinant human                                                                              |
| U-snRNP-BB'           | Diarect                 | 13301       | Small nuclear ribonucleoprotein 88', recombinant human                                                          |
| U1-A                  | Diarect                 | 13101       | Small nuclear ribonucleoprotein A, recombinant human                                                            |
| U1-C                  | Diarect                 | 13201       | Small nuclear ribonucleoprotein C, recombinant human                                                            |
| U1-snRNP68            | Diarect                 | 13001       | Small nuclear ribonucleoprotein 68 (U1-70), recombinant human                                                   |

**FIG E1.** Protein microarray composition. Purified biomolecules, including cytokines, chemokines, growth factors, and autoantigens, are listed with their respective vendors.

| Disease Code                                          | Number of Patients<br>with Finding |
|-------------------------------------------------------|------------------------------------|
| Pulmonary alveolar proteinosis                        | 11                                 |
| Candidiasis                                           | 6                                  |
| Healthy controls                                      | 6                                  |
| APS-1                                                 | 5                                  |
| Hypothyroidism                                        | 5                                  |
| Suspected pulmonary alveolar proteinosis              | 4                                  |
| TNF-inhibitor treated                                 | 3                                  |
| Undiagnosed immunodeficiency                          | 3                                  |
| APS-1 phenotype with no AIRE mutation on sequencing   | 2                                  |
| Rheumatoid arthritis                                  | 2                                  |
| Non-tuberculous mycobacterial disease                 | 2                                  |
| T-cell cytopenia                                      | 2                                  |
| Multi-organ autoimmunity                              | 2                                  |
| Thymoma                                               | 2                                  |
| Acanthosis                                            | 1                                  |
| Bronchiectasis                                        | 1                                  |
| Cholangitis                                           | 1                                  |
| Colitis                                               | 1                                  |
| Chronic salmonella                                    | 1                                  |
| Cutaneous lupus                                       | 1                                  |
| Common variable immunodeficiency                      | 1                                  |
| Granulomatous lung disease                            | 1                                  |
| Good's syndrome                                       | 1                                  |
| HHV6 infection                                        | 1                                  |
| Hyperkeratosis                                        | 1                                  |
| Interferon gamma treated                              | 1                                  |
| IL-12 receptor deficiency                             | 1                                  |
| Klebsiella infection                                  | 1                                  |
| Late onset progressive multifocal leukoencephalopathy | 1                                  |
| Systemic lupus erythematosus                          | 1                                  |
| Mucor mycosis                                         | 1                                  |
| Pulmonary fibrosis                                    | 1                                  |
| Pneumococcal infection                                | 1                                  |
| Recurrent tuberculosis                                | 1                                  |
| Shingles and persistent warts                         | 1                                  |
| Systemic sarcoidosis                                  | 1                                  |

**FIG E2.** Clinical characteristics of the cohort. The clinical diseases and phenotypes of patients and healthy control subjects are listed. Patients with more than 1 disease or disorder are listed under each applicable category.

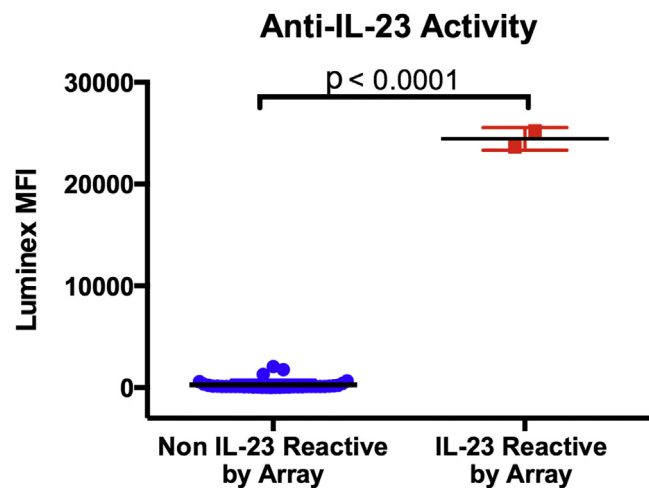

1453 **FIG E3.** IL-23 ACAA validation. IL-23 binding was also measured by means  
1454 of a Luminex analyzer, as described in the Methods section, to confirm IL-23  
1455 reactivity observed by using a cytokine microarray. MFI of samples 092B  
1456 and 562B were compared with all others by using the unpaired *t* test.

1457  
1458  
1459  
1460  
1461  
1462  
1463  
1464  
1465  
1466  
1467  
1468  
1469  
1470  
1471  
1472  
1473  
1474  
1475  
1476  
1477  
1478  
1479  
1480  
1481  
1482  
1483  
1484  
1485  
1486  
1487  
1488  
1489  
1490  
1491  
1492  
1493  
1494  
1495

1511  
1512  
1513  
1514  
1515  
1516  
1517  
1518  
1519  
1520  
1521  
1522  
1523  
1524  
1525  
1526  
1527  
1528  
1529  
1530  
1531  
1532  
1533  
1534  
1535  
1536  
1537  
1538  
1539  
1540  
1541  
1542  
1543  
1544  
1545  
1546  
1547  
1548  
1549  
1550  
1551  
1552  
1553  
1554  
1555

UNCORRECTED PROOF
